# Supplementary material for: Science-based entrepreneurship education as a means for university-industry technology transfer
Source: Springer Nature journal article supplement (doi:10.1007/s11365-019-00623-3), 2020-01-04
Supplement: MOESM1 [file 17544930]

**Supplementary material: Overview of the data**

| Nieuwe opleiding macrodoelmatigheidstoets 2014 (New master program, test macro efficiency 2014) | Internal document VU University Amsterdam |
| --- | --- |
| Toets nieuwe opleiding MA-program Science Business Innovation (Test New Master Program Science Business Innovation) | Internal document VU University Amsterdam |
| Domain specific reference framework | Internal document VU University Amsterdam |
| Overview of the program | Internal document VU University Amsterdam |
| Course descriptions | Internal document VU University Amsterdam |
| Overview of core staff involved | Internal document VU University Amsterdam |
| Overview of external contacts | Internal document VU University Amsterdam |
| Student-staff ratio | Internal document VU University Amsterdam |
| Contact hours per year | Internal document VU University Amsterdam |
| Advisory Board | Internal document VU University Amsterdam |
| Benchmark programs | Internal document VU University Amsterdam |
| Intended learning outcomes | Internal document VU University Amsterdam |
| Overview of job positions held by graduates | Internal document VU University Amsterdam |
| Arguments for a two-year programme | Internal document VU University Amsterdam |
| SBI PhD students and PhD projects | Internal document VU University Amsterdam |
| SBI Research program | Internal document VU University Amsterdam |
| Letter from the Faculty Board of FEW | Internal document VU University Amsterdam |
| Overzicht bedrijven/organisaties waar masters Science, Business & Innovation hun afstudeerstageonderzoek uitvoeren (Overview companies and organizations where master students SBI perform research for their master thesis) | Internal document VU University Amsterdam |
| Onderzoek arbeidsmarkt behoefte (Research on Labor Market Needs) | Internal document VU University Amsterdam |
| Onderzoek belangstelling masteropeleiding SBI (Research on interest in master programs SBI) | Internal document VU University Amsterdam |
| Overzicht vergelijkbare opleidingen inclusief instroom (Overview comparable master programs including inflow) | Internal document VU University Amsterdam |
| Profiel en overzicht onderwijsprogramma masteropleiding Science, Business & Innovation (Profile and overview educational program SBI) | Internal document VU University Amsterdam |
| Onderzoeksprogramma SBI *Valorization of Knowledge* (Research program SBI Valorization of knowledge) | Internal document VU University Amsterdam |
| Visie 2015-2020, Instellingsplan Vrije Universiteit Amsterdam (Vision 2015-2020, Institute Plan VU Amsterdam) | Internal document VU University Amsterdam |
| Onderwijsvisie Vrije Universiteit Amsterdam (Educational Vision VU Amsterdam) | Internal document VU University Amsterdam |
| Topsector Life Sciences & Health (2012) Human Capital Agenda Topsector Life Sciences & Health. | https://www.scienceguide.nl/media/690342/draft_hca_life_sciences_health.pdf |
| Van der Aalst, M. (2015) Welke beroepen bieden kansen? Overzicht van krapte- en overschotberoepen. UWV Afdeling Arbeidsmarktinformatie en –advise. (Which professions offer opportunities? Overview of scarcity and abundancy in the labor market) | https://docplayer.nl/79912-Welke-beroepen-bieden-kansen.html |
| Min OC&W (2015b) Wetenschapsvisie 2025; Keuzes voor de toekomst. Den Haag: Ministerie van Onderwijs, Cultuur en Wetenschap. (Vision on Science: choices for the future, Ministry of Education, Culture and Science) | https://www.rijksoverheid.nl/documenten/rapporten/2019/01/28/afrondende-rapportage-wetenschapsvisie-2025 |
| NWO (2013) Maatschappelijk Verantwoord Innoveren. Den Haag: NWO. (Corporate Social Responsibility, report of Dutch Scientific Council) | https://www.nwo-mvi.nl/nl |
| Verwevenheid van onderzoek en hoger onderwijs, Adviesraad voor wetenschap, technologie en innovatie (2015). (Interwovenness of research and higher Education, report of Advisory Council for Science, Technology and Innovation, 2015) | https://www.awti.nl/documenten/adviezen/2015/6/26/verwevenheid-van-hoger-onderwijs-en-onderzoek |
| Min. OC&W (2015a) De waarde(n) van weten; Strategische Agenda Hoger Onderwijs en Onderzoek 2015-2025. Den Haag: Ministerie van Onderwijs, Cultuur en Wetenschap. (Value of Science: Strategic Agenda Higher Education and Research 2015-2025, Ministry of Education, Culture and Science) | https://www.rijksoverheid.nl/documenten/kamerstukken/2015/07/07/aanbieding-strategische-agenda-hoger-onderwijs-en-onderzoek |
| Topsector Energie, Human Capital Agenda versie 2.0, 20120213 | https://www.topsectorenergie.nl/sites/default/files/uploads/HCA/Human%20Capital%20Agenda%20Topsector%20Energie.pdf |
| Topsector Energie (2015) Human Capital Agenda 2020 Topsector Energie: Plan van aanpak 2015-2017. | https://www.topsectoren.nl/human-capital |
| Bussemaker, J. (2015) Het hoger onderwijs als broedplaats van ideeën en talent. In: De waarde(n) van weten; Strategische Agenda Hoger Onderwijs en Onderzoek 2015-2025. Den Haag: Ministerie van Onderwijs, Cultuur en Wetenschap. (Higher education as breeding ground for ideas and talents, part of strategic agenda 2015-2025, Ministry of Education, Culture and Science) | https://www.rijksoverheid.nl/documenten/kamerstukken/2015/07/07/aanbieding-strategische-agenda-hoger-onderwijs-en-onderzoek |
| Van der Meulen, B., Maclaine Pont, P., Faasse, P., Deuten, J., Belder, R. (2015) Keuzes voor de toekomst van de Nederlandse wetenschap; Analyse van beleidsopties bij vier scenario’s. Den Haag: Rathenau Instituut. (Choices for the future of Dutch Science: Analysis of policy options based on four scenarios) | https://www.rathenau.nl/sites/default/files/Keuzes_Wetenschapsbeleid_2025.pdf |
| VSNU (2015) Goedemorgen Professor! Visie op studeren in een nieuwe tijd. Den Haag: VSNU. (Good morning professor: Studying in the New Age) | http://vsnu.nl/files/documenten/Publicaties/Visie_op_studeren_in_een_nieuwe_tijd_20150611.pdf |
| Overzicht vergelijkbare opleidingen (Overview comparable master programs) | Internal document VU University Amsterdam |
| Onderzoek belangstelling voor de tweejarige masteropleiding (Research on interest for master trajectory SBI) | Internal document VU University Amsterdam |
| Onderzoek alumni afstudeerrichtingen (Research on alumni and specialization) | Internal document VU University Amsterdam |
| ROA (2015). De arbeidsmarkt naar opleiding en beroep tot 2020, Maastricht University (Labor market from education to profession, 2020) | http://roa.sbe.maastrichtuniversity.nl/?p=7634 |
| UWV (2015). UWV Arbeidsmarktprognose 2015-2016, Amsterdam: UWV (Employment prognosis 2015-2016) | https://www.uwv.nl/overuwv/Images/UWV_Arbeidsmarktprognose%202015-2016.pdf |
| CBS (2016). Vacatures; SBI2008; particuliere bedrijven, Den Haag: CBS (Vacancies, private parties, 2008) | https://statline.cbs.nl/Statweb/ |
| CBS (2015) Werkgelegenheid rond energie sterk gestegen. Den Haag :CBS (Employment in energy sector sharply increased) | https://statline.cbs.nl/Statweb/ |
